# Supplementary material
Source: publisher figshare collection journal article supplement (https://frontiersin.figshare.com/ndownloader/files/11707373)
Supplement: Supplementary file [file 11707373]

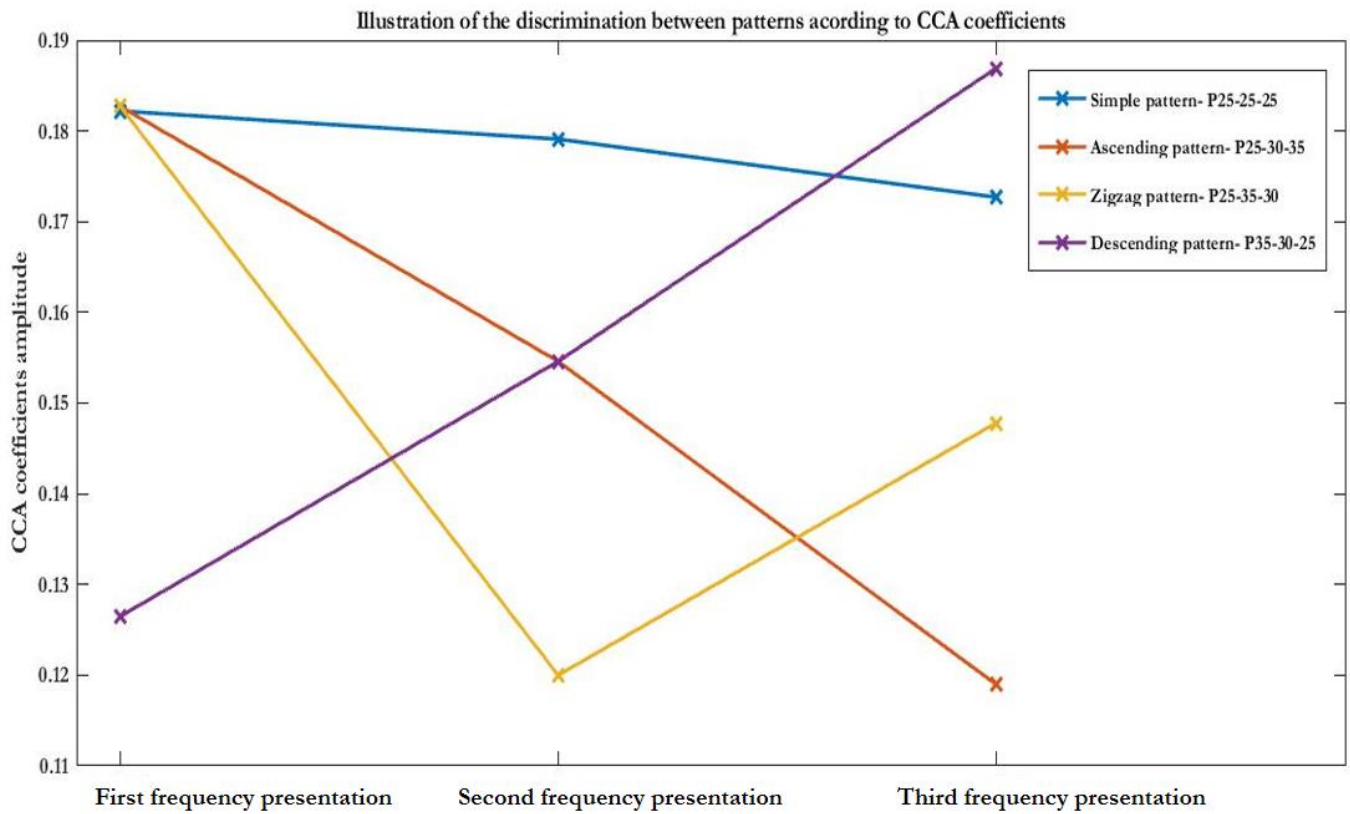

**Supplementary figure S5: Discrimination of patterns according to the amplitude of the CCA coefficients.**
